# Supplementary material for: Preparation of shell cross-linked nanoparticles via miniemulsion RAFT polymerization
Source: Royal Society of Chemistry journal article supplement (doi:10.1039/c0py00170h), 2010-01-01
Supplement: c0py00170h.pdf [file c0py00170h.pdf]

## Preparation of Shell Cross-linked Nanoparticles via Miniemulsion RAFT Polymerization

Yin Wang <sup>a,b</sup>, Guohua Jiang, <sup>\*a,b</sup> Xinke Sun, <sup>a,b</sup> Miaojun Ding, <sup>b</sup> Hongyuan Hu <sup>b</sup> and Wenxing  
Chen <sup>a,b</sup>

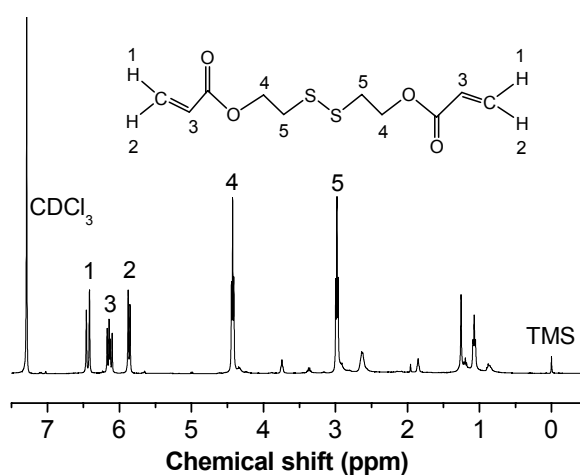

**Fig S1.** <sup>1</sup>H NMR spectrum of bis(acryloxyethyl) disulfide (BAEDS) in CDCl<sub>3</sub>.

\* To whom correspondence should be addressed. Tel: +86 571 86843527; E-mail address:  
polymer\_jiang@hotmail.com (G. Jiang).

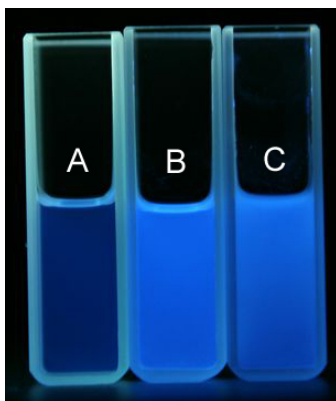

**Fig S2.** The illumination photograph of PDMAEMA-*b*-PS (B) and the synthesized shell cross-linked nanoparticles (C) in CHCl<sub>3</sub> under a mixture of 254 nm and 365 nm irradiation (A is for pure CHCl<sub>3</sub>).

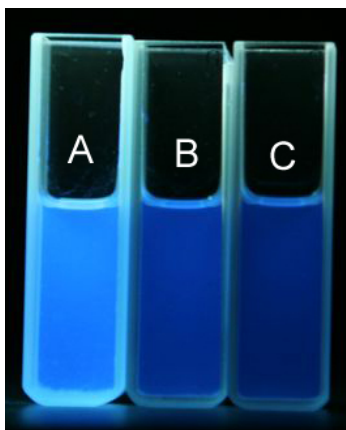

**Fig S3.** The illumination photograph of PDMAEMA-*b*-PS nanoparticles in CHCl<sub>3</sub> with different concentrations under a mixture of 254 nm and 365 nm irradiation (A: 0.005g/mL, B: 0.001g/mL, C: 0.0002g/mL).

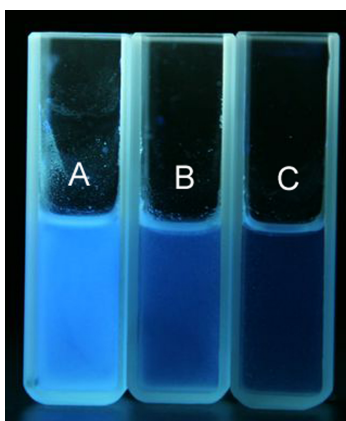

**Fig S4.** The illumination photograph of the synthesized shell cross-linked nanoparticles in CHCl<sub>3</sub> with different concentrations under a mixture of 254 nm and 365 nm irradiation (A: 0.005g/mL, B: 0.001g/mL, C: 0.0002g/mL).
